# Supplementary material
Source: MDPI journal article supplement (https://www.mdpi.com/2073-4344/13/2/311)
Supplement: s1 [file s1]

# Copolymerization of Norbornene and Methyl Acrylate by Nickel Catalyst bearing 2-(Diarylphosphino)-N-Phenylbenzenamine Ligands

Lixin Cao,<sup>1</sup> Zhengguo Cai <sup>1,\*</sup> and Mingyuan Li <sup>2,\*</sup>

<sup>1</sup> State Key Laboratory for Modification of Chemical Fibers and Polymer Materials, College of Materials Science and Engineering, Donghua University, Shanghai 201620, P. R. China

<sup>2</sup> Department of Chemistry, Guangdong Technion - Israel Institute of Technology, Shantou 515063, P. R. China

\*Correspondence: caizg@dhu.edu.cn (C.Z.); mingyuan.li@gtit.edu.cn (L.M.)

## Table of Contents

|                                                                                          |    |
|------------------------------------------------------------------------------------------|----|
| 1 Crystallographic Data for ligand L1 and complexes Ni1 and Ni2 .....                    | 2  |
| 2 Spectra Data .....                                                                     | 4  |
| 2.1 <sup>31</sup> P, <sup>1</sup> H and <sup>13</sup> C NMR spectra of the ligands ..... | 4  |
| 2.1 MALDI-TOF-MS spectrometry of ligands and complexes .....                             | 8  |
| 2.3 <sup>1</sup> H and <sup>13</sup> C NMR spectra of copolymers .....                   | 10 |
| 2.4 GPC data of homopolymers and copolymers .....                                        | 13 |
| 2.5 DSC data of copolymers .....                                                         | 20 |

## 1 Crystallographic data for ligand L2 and complexes Ni1 and Ni2

**Table S1.** Crystal data and structure refinement for complexes **Ni1** and **Ni2**.

| Entry                                      | Ni1                                                                  | Ni2                                                                                 |
|--------------------------------------------|----------------------------------------------------------------------|-------------------------------------------------------------------------------------|
| Empirical formula                          | C <sub>25</sub> H <sub>22</sub> Br <sub>2</sub> Cl <sub>2</sub> NNiP | C <sub>27</sub> H <sub>24</sub> Br <sub>2</sub> Cl <sub>2</sub> NNiO <sub>2</sub> P |
| Formula weight                             | 656.839                                                              | 714.876                                                                             |
| Temperature (K)                            | 300.0                                                                | 299.0                                                                               |
| Wavelength (Å)                             | 1.34139                                                              | 1.34139                                                                             |
| Crystal system                             | triclinic                                                            | monoclinic                                                                          |
| Space group                                | P-1                                                                  | P2 <sub>1</sub> /n                                                                  |
| a (Å)                                      | 9.0465(7)                                                            | 9.1088(11)                                                                          |
| b (Å)                                      | 10.6576(8)                                                           | 17.448(2)                                                                           |
| c (Å)                                      | 14.8738(11)                                                          | 18.5128(19)                                                                         |
| α (°)                                      | 78.729(3)                                                            | 90                                                                                  |
| β (°)                                      | 77.450(3)                                                            | 93.780(3)                                                                           |
| γ (°)                                      | 72.622(3)                                                            | 90                                                                                  |
| Volume (Å <sup>3</sup> )                   | 1322.70(17)                                                          | 2935.9(6)                                                                           |
| Z                                          | 2                                                                    | 4                                                                                   |
| Density (calculated) (Mg/m <sup>3</sup> )  | 1.326                                                                | 1.385                                                                               |
| Absorption coefficient (mm <sup>-1</sup> ) | 2.854                                                                | 3.355                                                                               |
| F(000)                                     | 652.9                                                                | 1425.9                                                                              |
| Crystal size (mm <sup>3</sup> )            | 0.05 x 0.03 x 0.02                                                   | 0.06 x 0.04 x 0.02                                                                  |
| Theta range for data collection (°)        | 4.04 to 50.86                                                        | 4.4 to 50.8                                                                         |
| Index ranges                               | -10 ≤ h ≤ 10, -12 ≤ k ≤ 17, -17 ≤ l ≤ 17                             | -10 ≤ h ≤ 10, -21 ≤ k ≤ 21, -22 ≤ l ≤ 22                                            |
| Reflections collected                      | 66926                                                                | 136841                                                                              |
| Independent reflections                    | 4864 [R(int) = 0.1014]                                               | 5376 [R(int) = 0.1097]                                                              |
| Completeness to theta = 53.594°            | 100%                                                                 | 99.9%                                                                               |
| Absorption correction                      | Semi-empirical from equivalents                                      | Semi-empirical from equivalents                                                     |
| Max. and min. transmission                 | 0.7508 and 0.6090                                                    | 0.7508 and 0.4890                                                                   |
| Refinement method                          | Full-matrix least-squares on F <sup>2</sup>                          | Full-matrix least-squares on F <sup>2</sup>                                         |
| Data / restraints / parameters             | 4864 / 21 / 289                                                      | 5376 / 0 / 312                                                                      |
| Goodness-of-fit on F <sup>2</sup>          | 1.058                                                                | 1.058                                                                               |
| Final R indices [I>2σ(I)]                  | R1 = 0.0466,<br>wR2 = 0.1157                                         | R1 = 0.0503,<br>wR2 = 0.1370                                                        |
| R indices (all data)                       | R1 = 0.0640,<br>wR2 = 0.1277                                         | R1 = 0.0604,<br>wR2 = 0.1497                                                        |
| Extinction coefficient                     | n/a                                                                  | n/a                                                                                 |
| Largest diff. peak and hole                | 1.37 and -1.04                                                       | 0.86 and -0.99                                                                      |

(e.Å<sup>-3</sup>)

**Table S2.** Crystal data and structure refinement for ligand **L2**.

| Entry                                            | <b>L2</b>                                                      |
|--------------------------------------------------|----------------------------------------------------------------|
| Empirical formula                                | C <sub>26</sub> H <sub>24</sub> N <sub>1</sub> OP <sub>1</sub> |
| Formula weight                                   | 413.44                                                         |
| Temperature (K)                                  | 173.0                                                          |
| Wavelength (Å)                                   | 1.34139                                                        |
| Crystal system                                   | Triclinic                                                      |
| Space group                                      | P-1                                                            |
| a (Å)                                            | 7.3625(3)                                                      |
| b (Å)                                            | 11.3415(5)                                                     |
| c (Å)                                            | 13.1442(6)                                                     |
| α (°)                                            | 81.111(2)                                                      |
| β (°)                                            | 81.669(2)                                                      |
| γ (°)                                            | 83.559(2)                                                      |
| Volume (Å <sup>3</sup> )                         | 1068.40(8)                                                     |
| Z                                                | 4                                                              |
| Density (calculated) (Mg/m <sup>3</sup> )        | 1.285                                                          |
| Absorption coefficient (mm <sup>-1</sup> )       | 0.850                                                          |
| F(000)                                           | 436                                                            |
| Crystal size (mm <sup>3</sup> )                  | 0.08 x 0.06 x 0.06                                             |
| Theta range for data collection (°)              | 3.446 to 55.035                                                |
| Index ranges                                     | -8<=h<=8, -13<=k<=13, -16<=l<=15                               |
| Reflections collected                            | 12523                                                          |
| Independent reflections                          | 4023 [R(int) = 0.0635]                                         |
| Completeness to theta = 53.594°                  | 99.2 %                                                         |
| Absorption correction                            | Semi-empirical from equivalents                                |
| Max. and min. transmission                       | 0.7508 and 0.5390                                              |
| Refinement method                                | Full-matrix least-squares on F <sup>2</sup>                    |
| Data / restraints / parameters                   | 4023 / 0 / 273                                                 |
| Goodness-of-fit on F <sup>2</sup>                | 1.039                                                          |
| Final R indices [I>2sigma(I)]                    | R1 = 0.0593, wR2 = 0.1599                                      |
| R indices (all data)                             | R1 = 0.0681, wR2 = 0.1710                                      |
| Extinction coefficient                           | n/a                                                            |
| Largest diff. peak and hole (e.Å <sup>-3</sup> ) | 0.547 and -0.675                                               |

## 2 Spectra data

### 2.1 $^{31}\text{P}$ , $^1\text{H}$ and $^{13}\text{C}$ NMR spectra of the ligands.

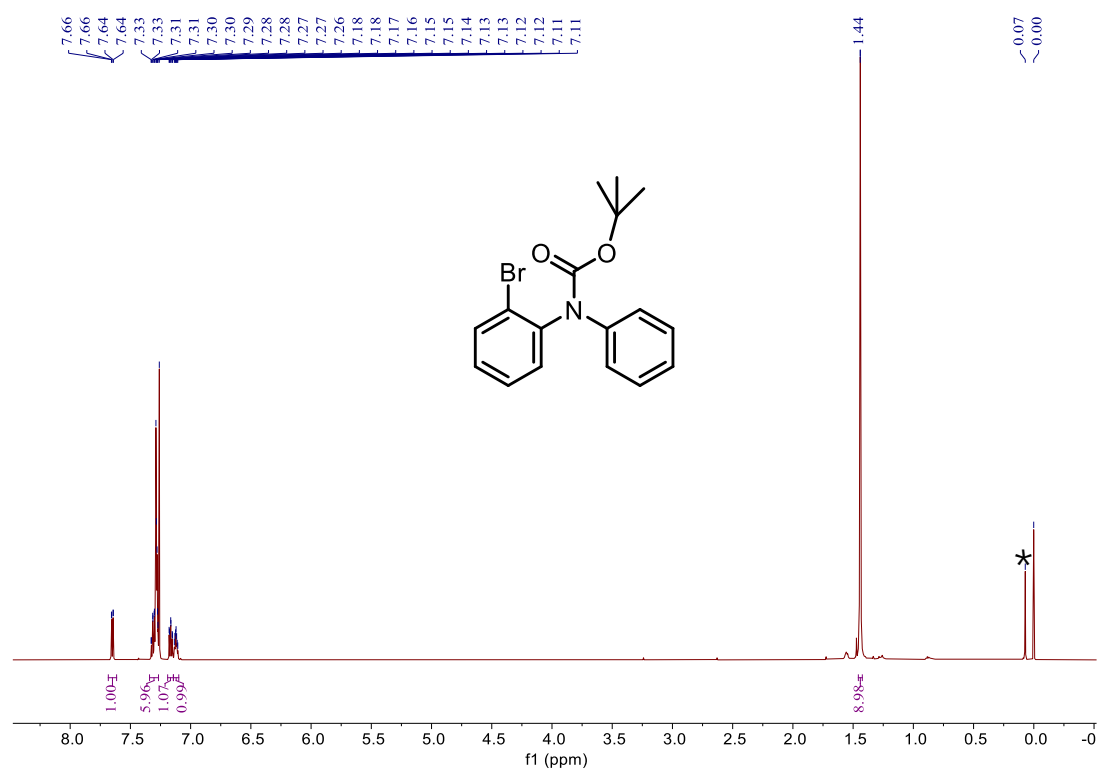

**Figure S1.**  $^{31}\text{P}$  NMR spectrum of *tert*-butyl N-(2-bromophenyl)-N-phenylcarbamate in CDCl<sub>3</sub> (\*silicone grease).

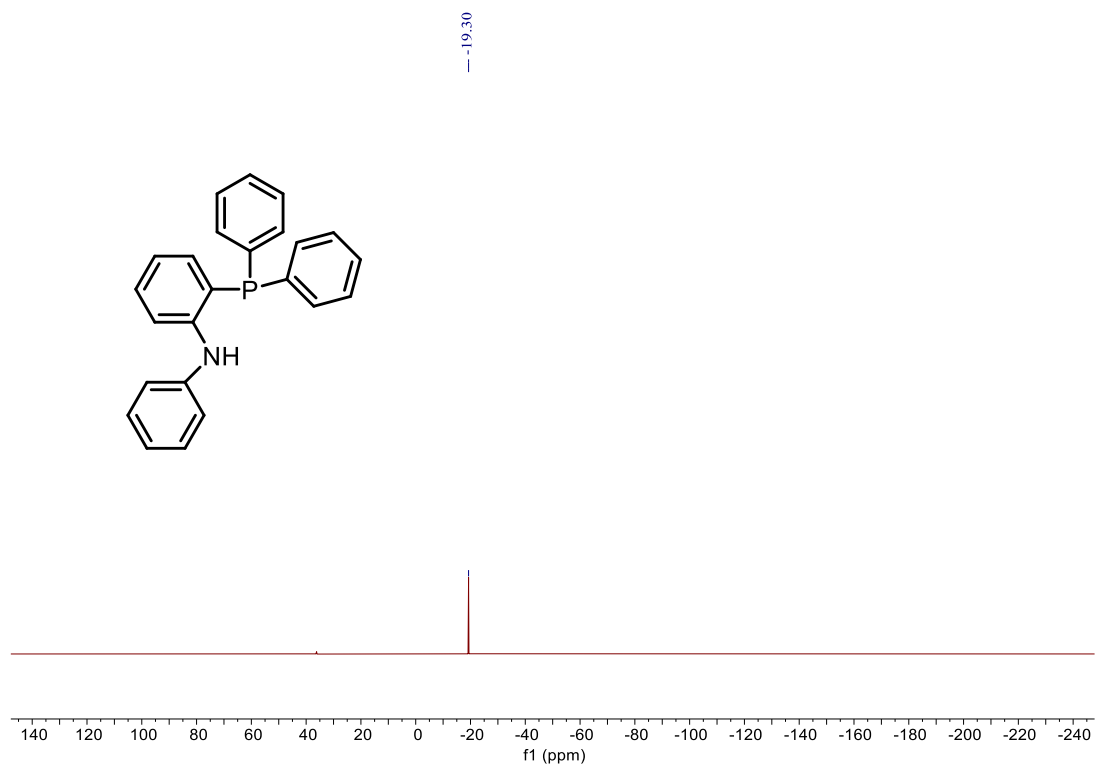

**Figure S2.**  $^{31}\text{P}$  NMR spectrum of **L1** in  $\text{CDCl}_3$ .

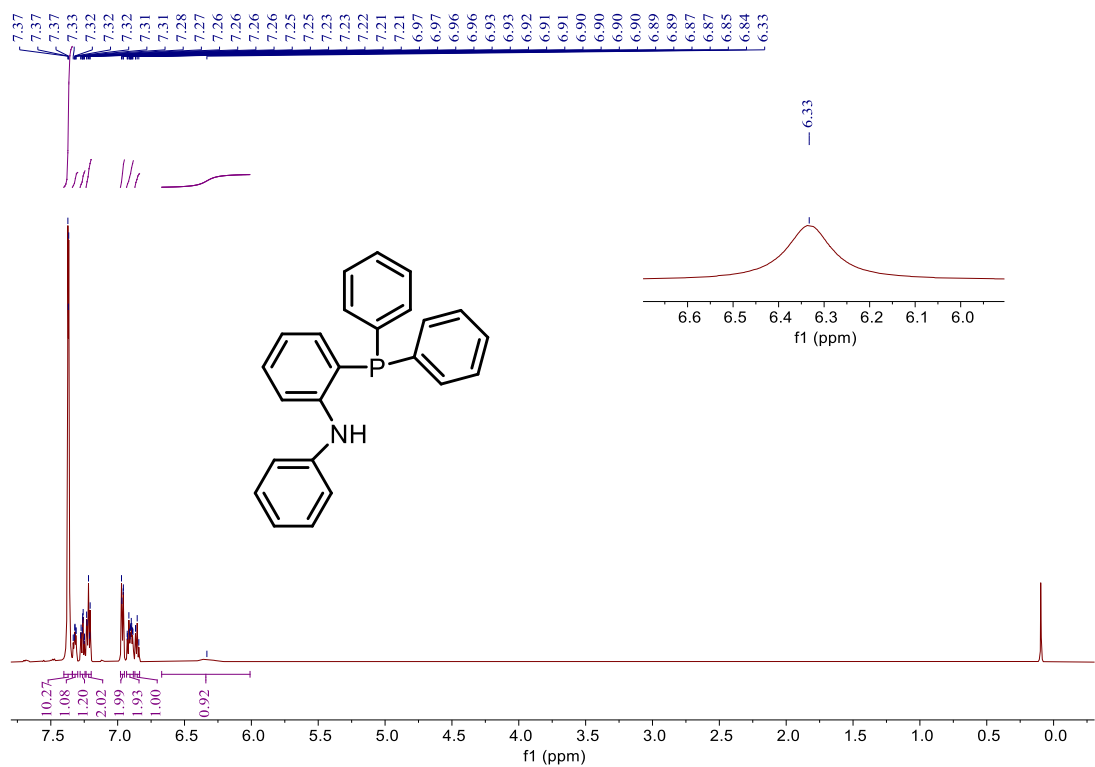

**Figure S3.**  $^1\text{H}$  NMR spectrum of **L1** in  $\text{CDCl}_3$ .

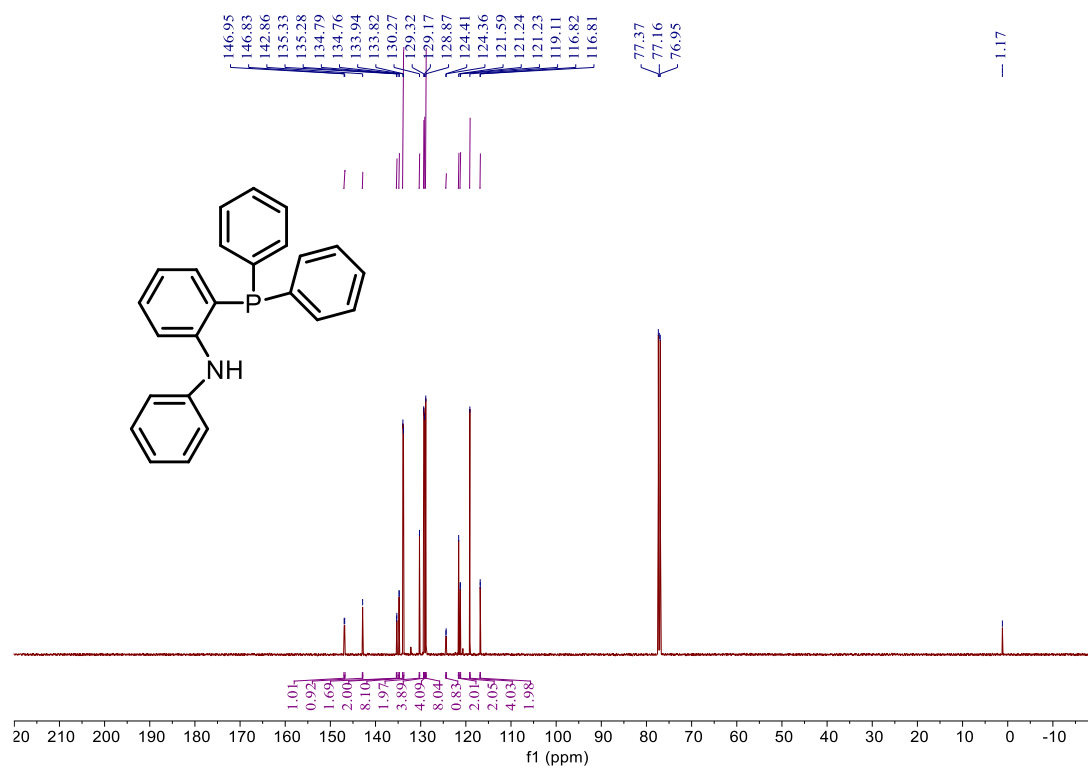

**Figure S4.** <sup>13</sup>C NMR spectrum of **L1** in CDCl<sub>3</sub>.

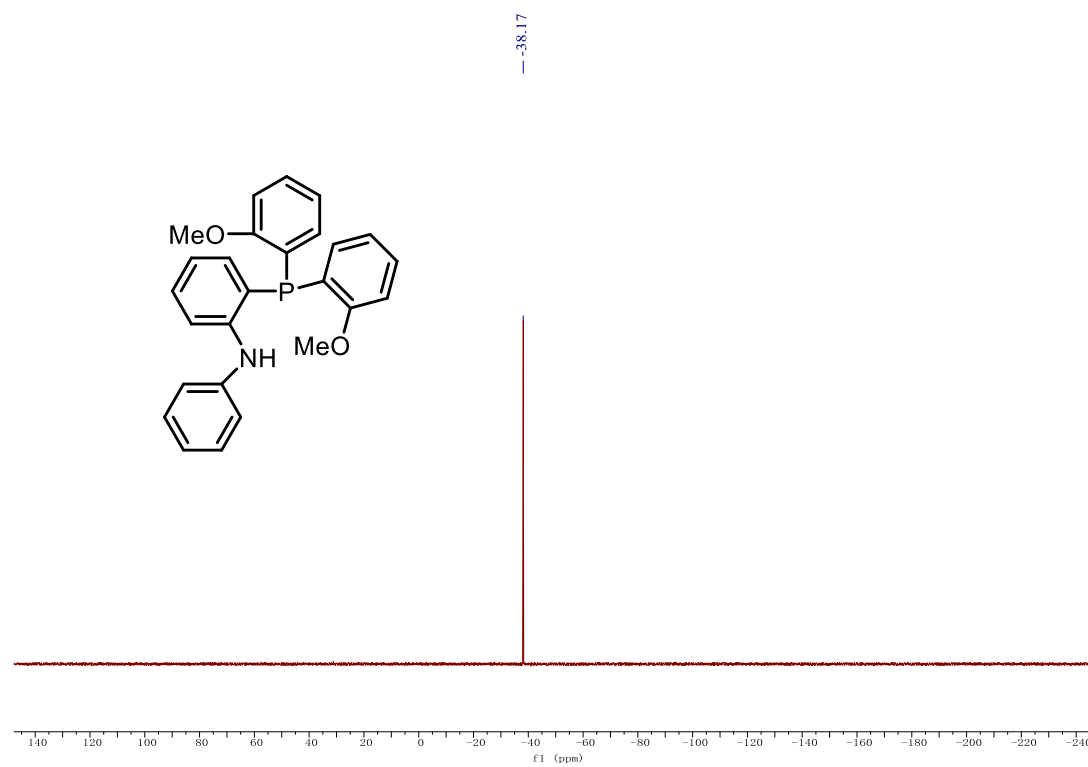

**Figure S5.** <sup>31</sup>P NMR spectrum of **L2** in DMSO-*d*<sub>6</sub>.

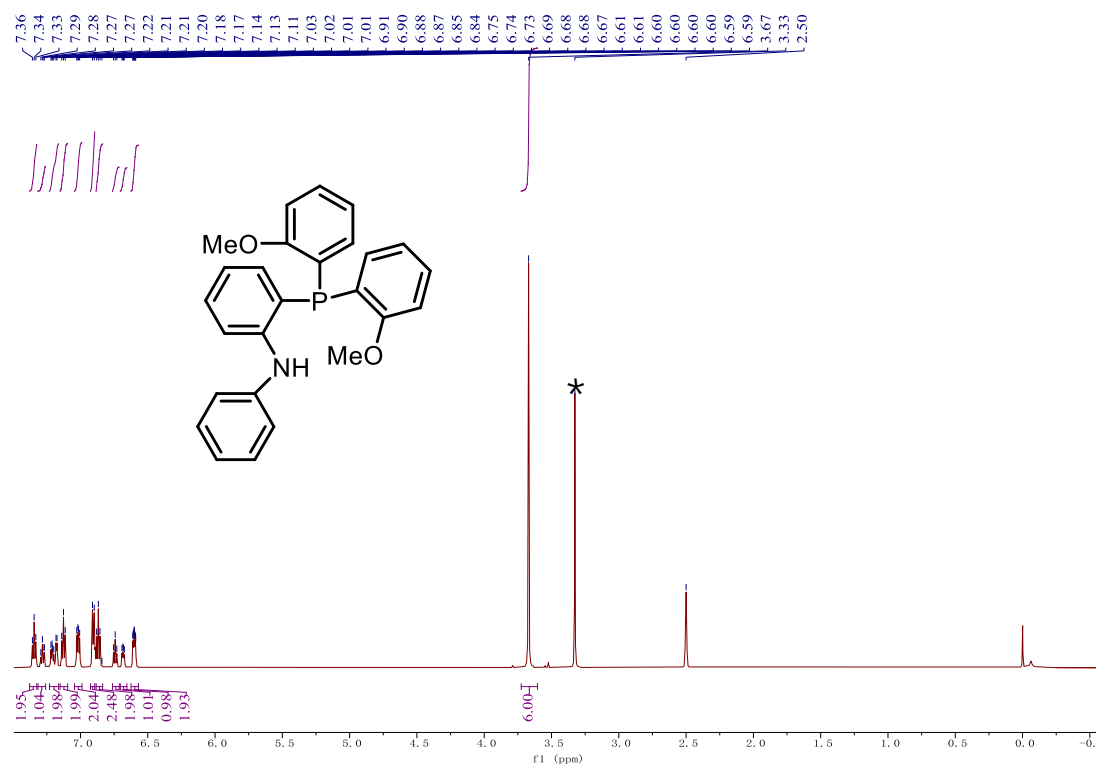

**Figure S6.**  $^1\text{H}$  NMR spectrum of **L2** in  $\text{DMSO-}d_6$  (\* $\text{H}_2\text{O}$ ).

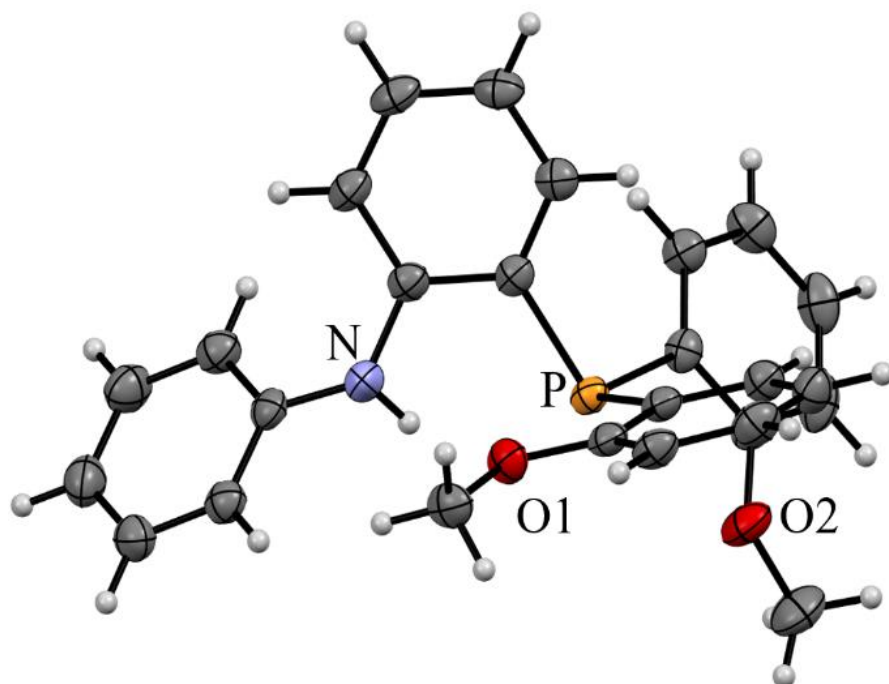

**Figure S7.** ORTEP representation of ligand **L2** (50% thermal ellipsoids).

## 2.1 MALDI-TOF-MS spectrometry of ligands and complexes.

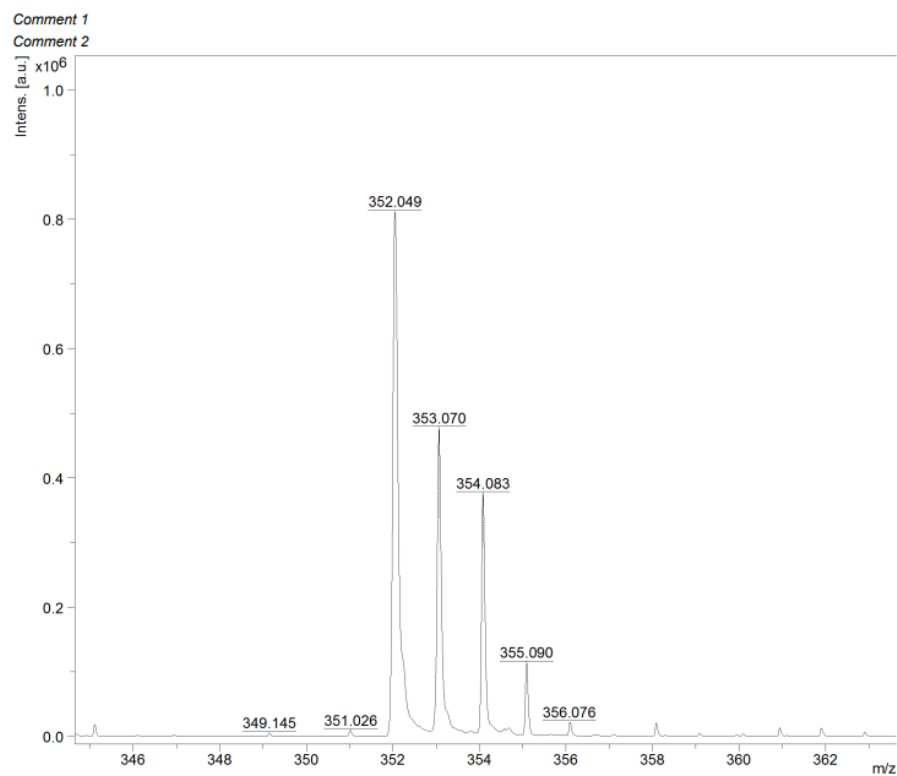

Figure S8. MALDI-TOF-MS spectrum of L1.

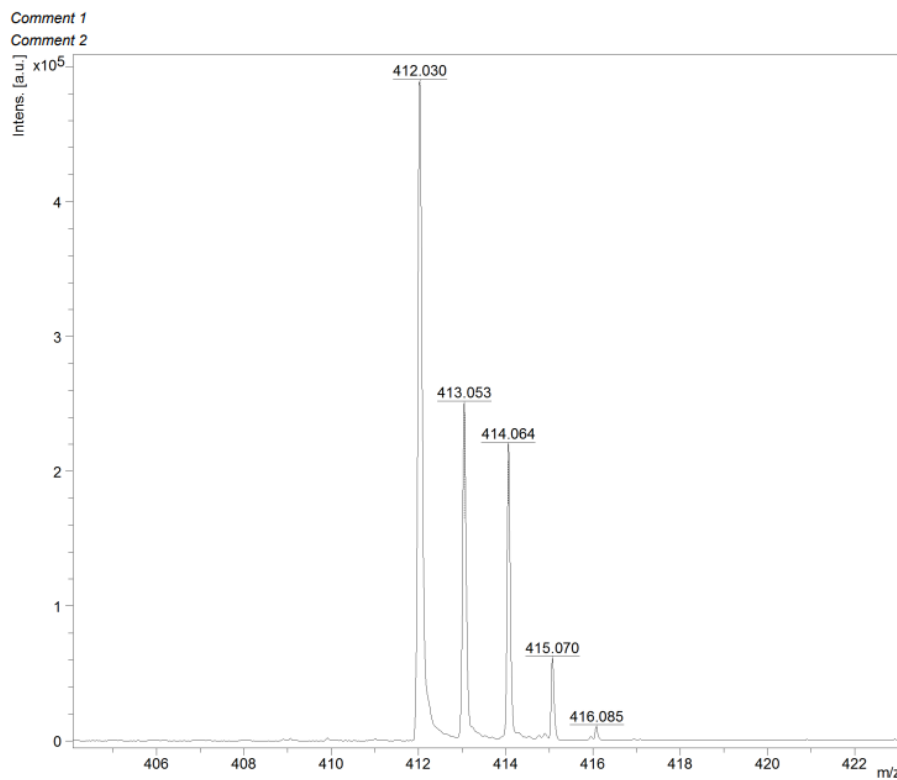

Figure S9. MALDI-TOF-MS spectrum of L2.



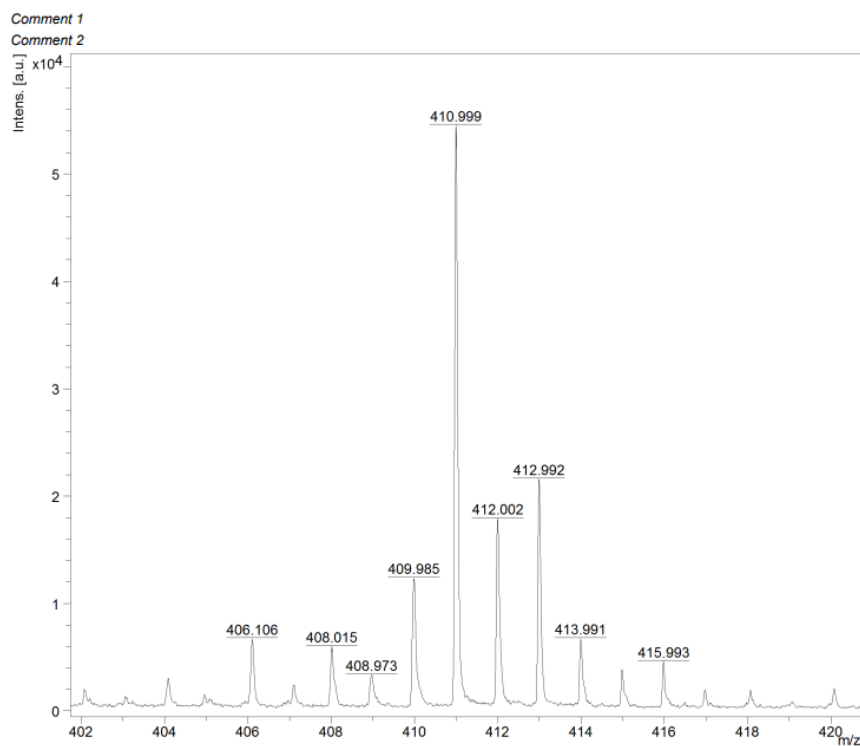

**Figure S10.** MALDI-TOF-MS spectrum of Ni1.

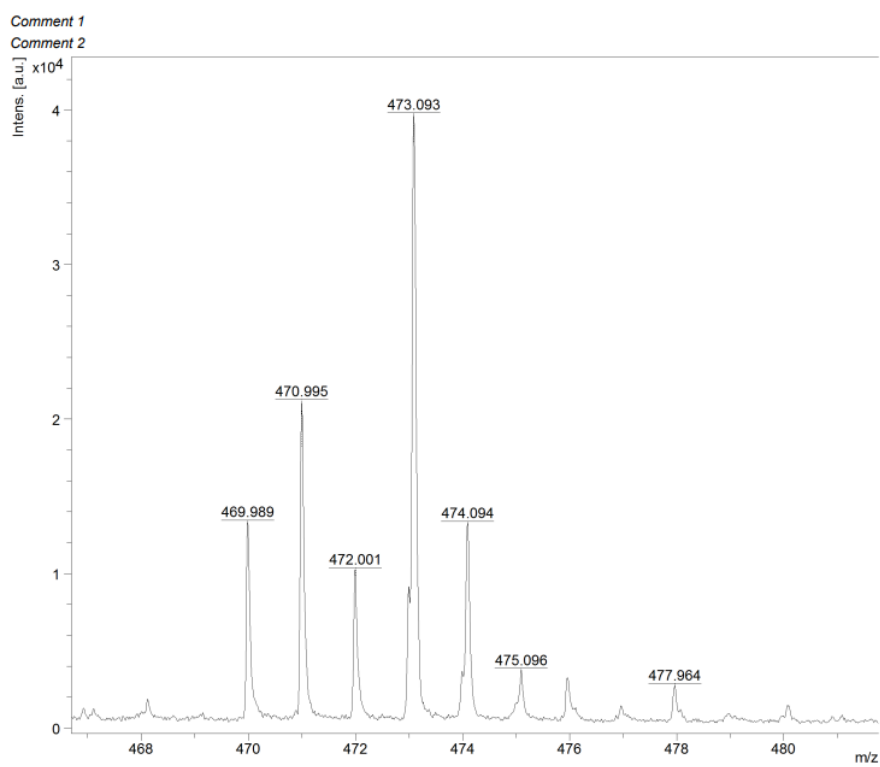

**Figure S11.** MALDI-TOF-MS spectrum of Ni2.

### 2.3 $^1\text{H}$ and $^{13}\text{C}$ NMR spectra of copolymers

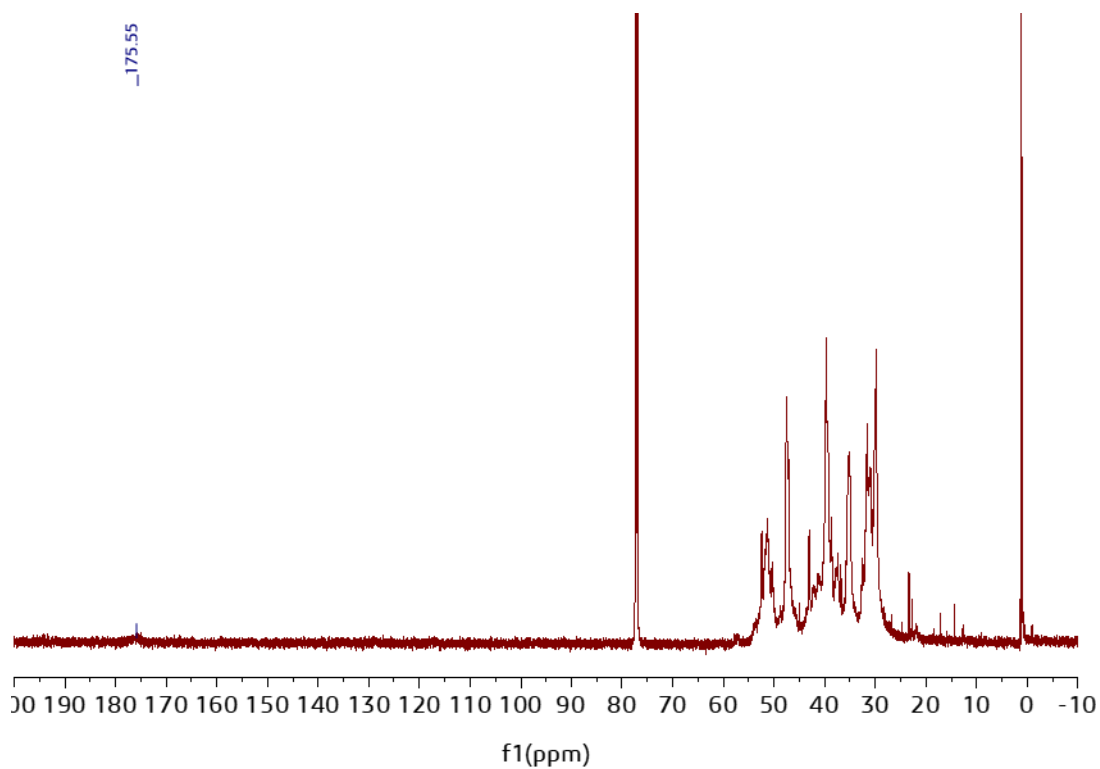

**Figure S12.**  $^{13}\text{C}$  NMR spectrum of copolymer from Table 2, entry 3.

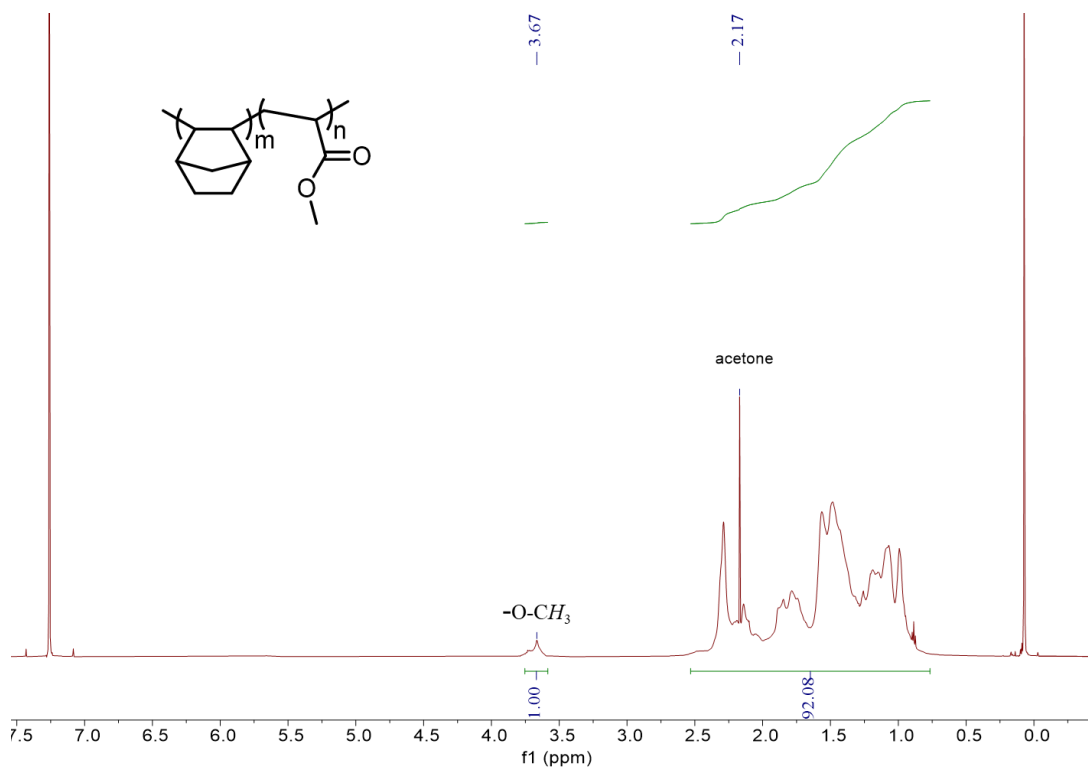

**Figure S13.**  $^1\text{H}$  NMR spectrum of copolymer from Table 2, entry 1.

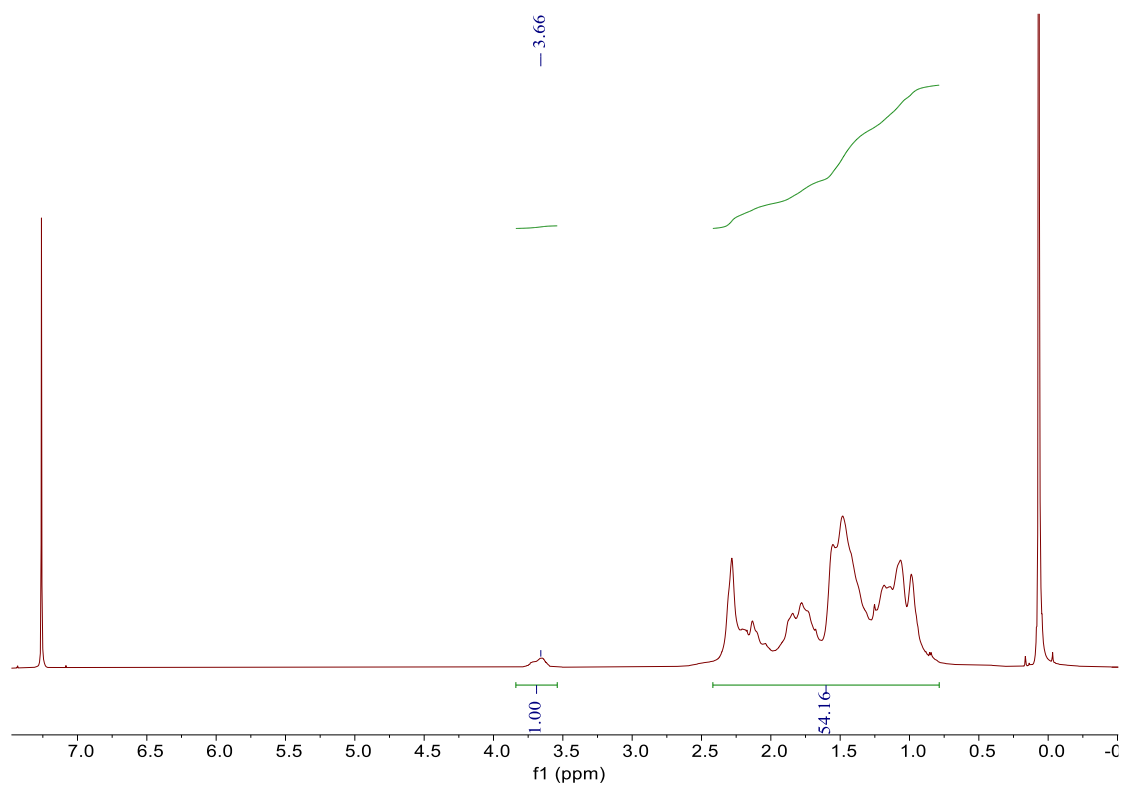

**Figure S14.**  $^1\text{H}$  NMR spectrum of copolymer from Table 2, entry 2.

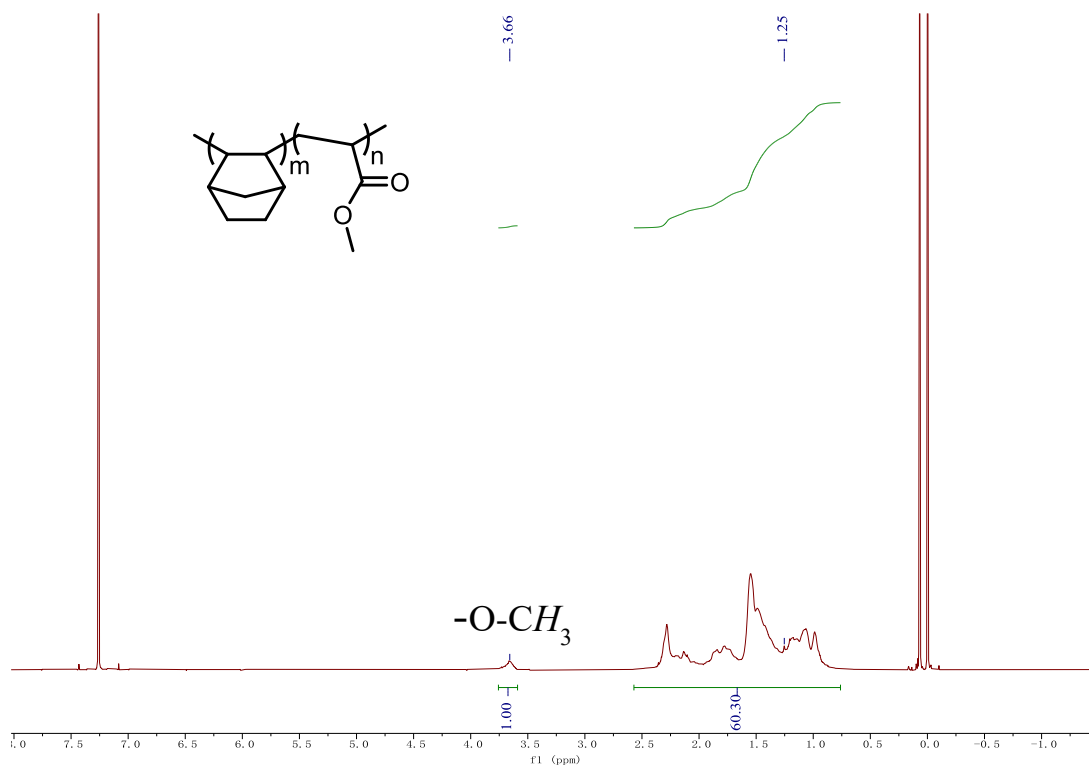

**Figure S15.**  $^1\text{H}$  NMR spectrum of copolymer from Table 2, entry 3.

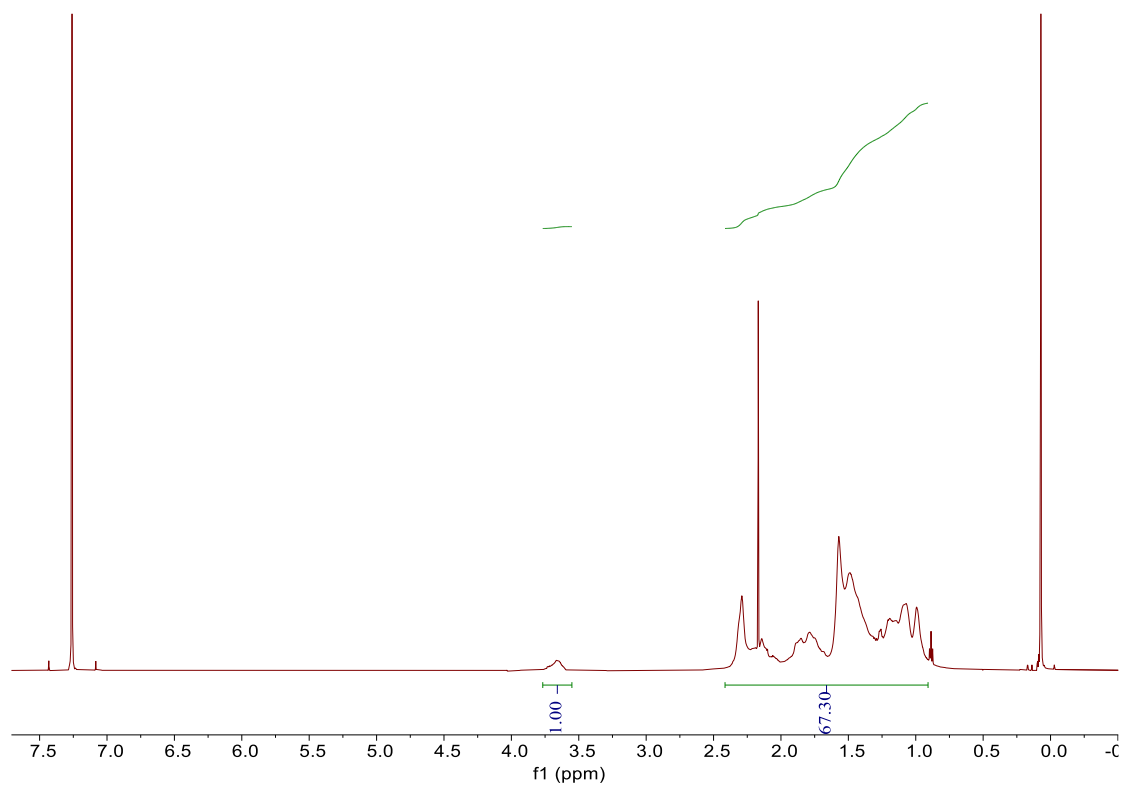

**Figure S16.** <sup>1</sup>H NMR spectrum of copolymer from Table 2, entry 4.

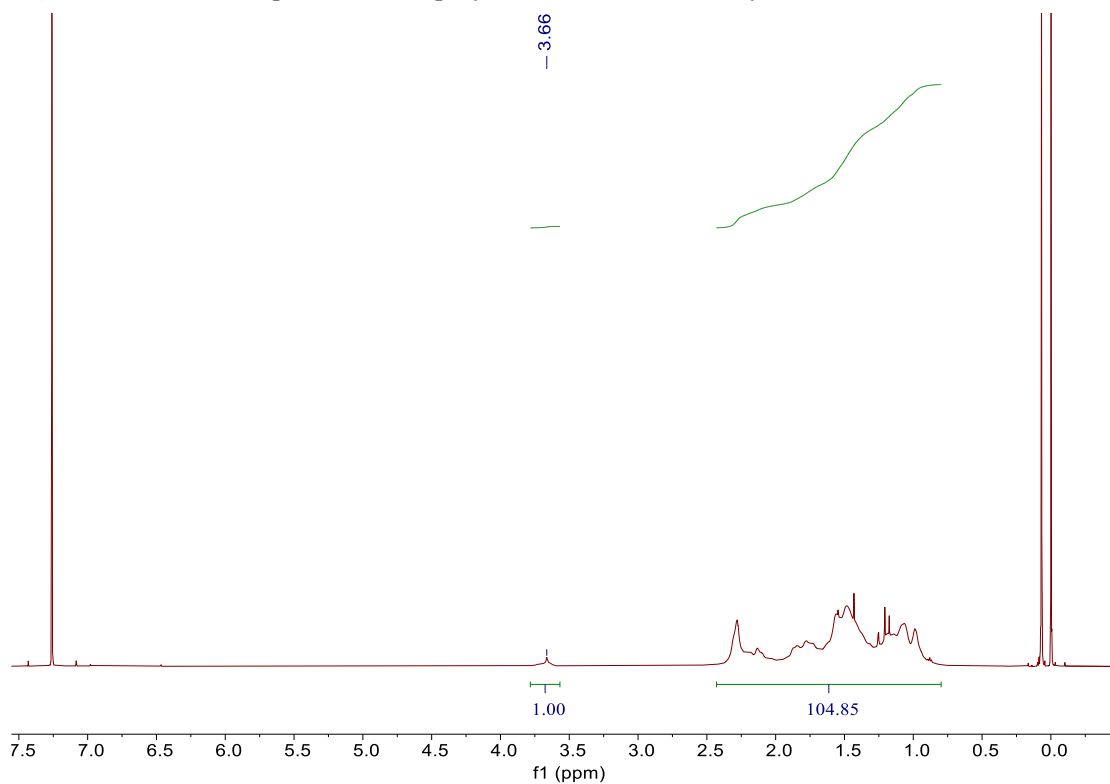

**Figure S17.** <sup>1</sup>H NMR spectrum of copolymer from Table 2, entry 5.

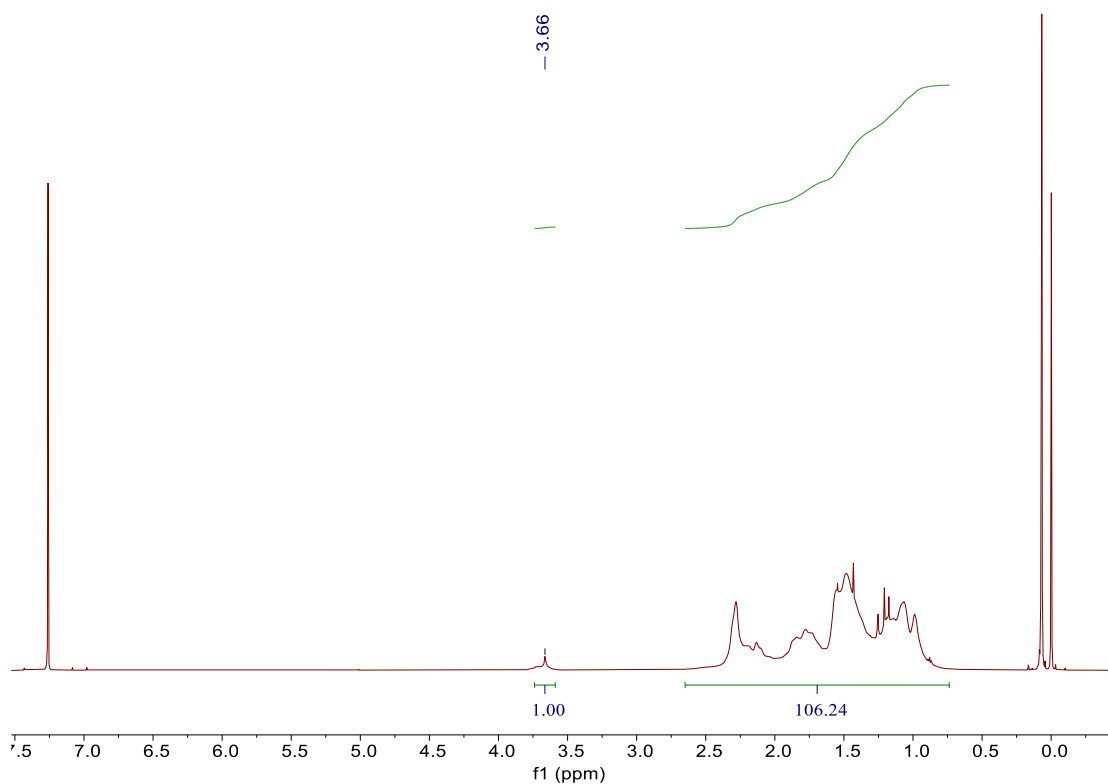

**Figure S18.**  $^1\text{H}$  NMR spectrum of copolymer from Table 2, entry 6.

## 2.4 GPC data of polymer and copolymer

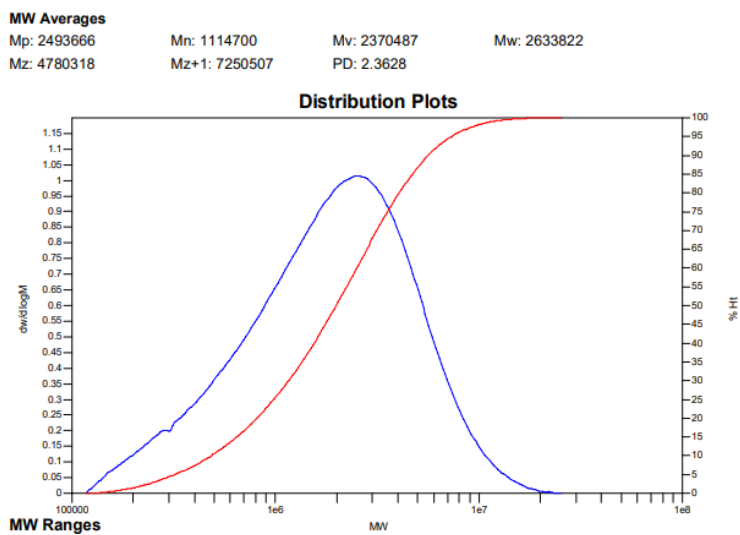

**Figure S19.** GPC data of the polymer from Table 1, entry 1.

**MW Averages**

Mp: 2598251      Mn: 1055123      Mv: 2283320      Mw: 2532709  
Mz: 4483517      Mz+1: 6531876      PD: 2.4004

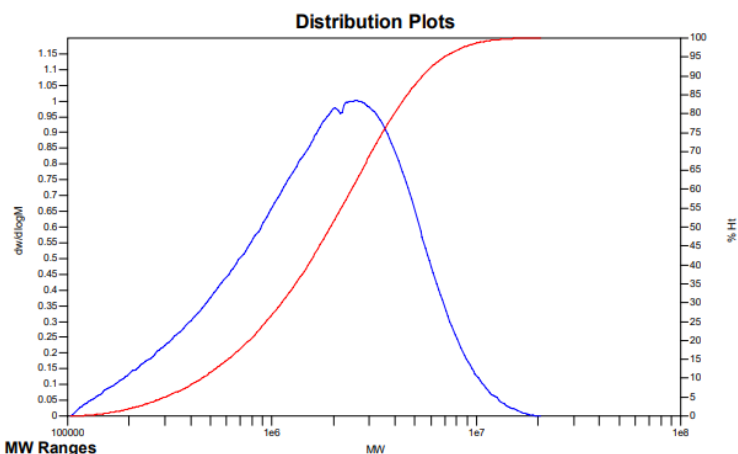

Figure S20. GPC data of the polymer from Table 1, entry 2.

**MW Averages**

Mp: 3999724      Mn: 1947133      Mv: 3922610      Mw: 4310371  
Mz: 7366350      Mz+1: 10801220      PD: 2.2137

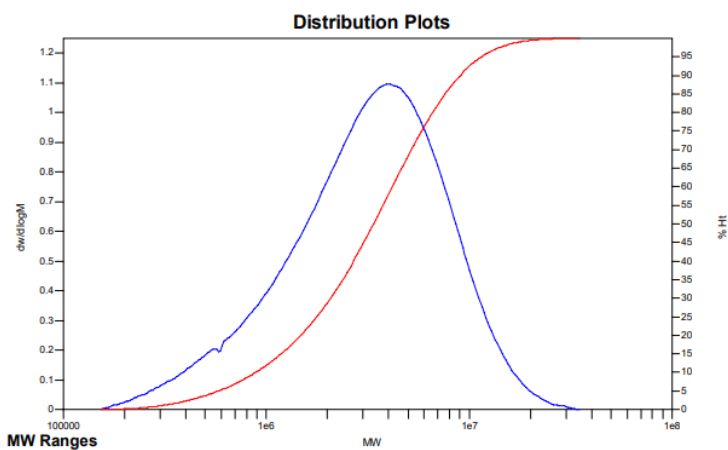

Figure S21. GPC data of the polymer from Table 1, entry 3.

**MW Averages**

Mp: 4911835      Mn: 2232385      Mv: 5145984      Mw: 5738706  
Mz: 10578315      Mz+1: 16044205      PD: 2.5707

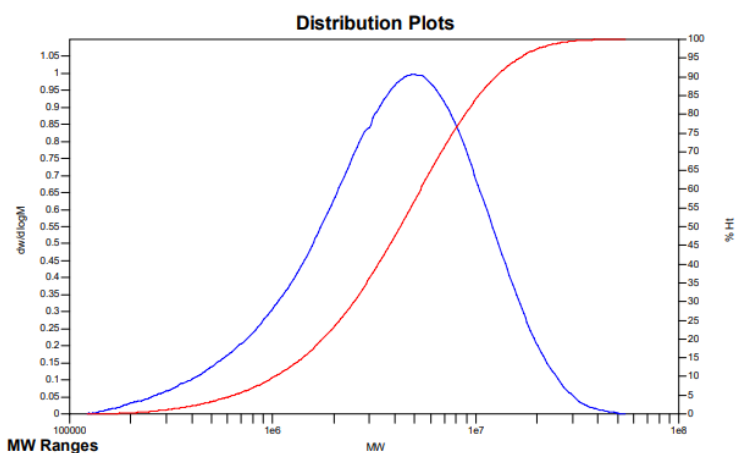

Figure S22. GPC data of the polymer from Table 1, entry 4.

**MW Averages**

Mp: 5332481 Mn: 2743683 Mv: 5564762 Mw: 6131354  
Mz: 10611977 Mz+1: 15438445 PD: 2.2347

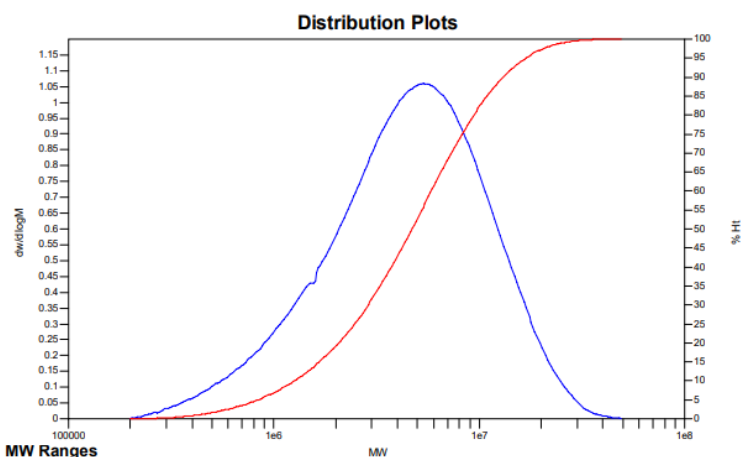

Figure S23. GPC data of the polymer from Table 1, entry 5.

**MW Averages**

Mp: 3535914 Mn: 1364875 Mv: 3399330 Mw: 3811780  
Mz: 7181173 Mz+1: 11027160 PD: 2.7928

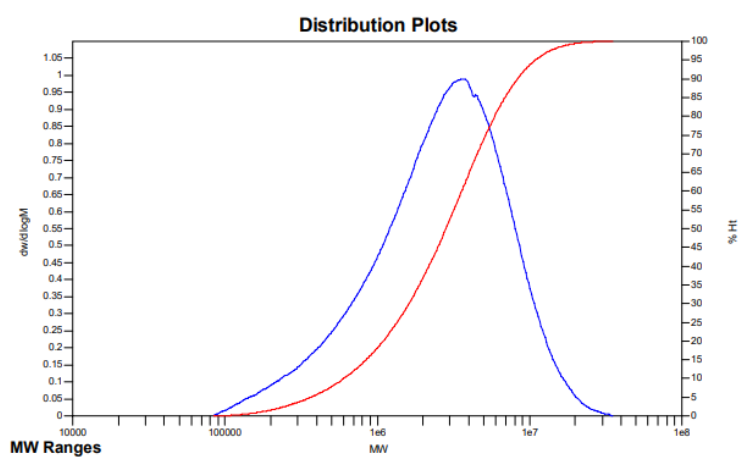

Figure S24. GPC data of the polymer from Table 1, entry 6.

**MW Averages**

Mp: 3464020 Mn: 1374080 Mv: 3285797 Mw: 3677346  
Mz: 6806121 Mz+1: 10127961 PD: 2.6762

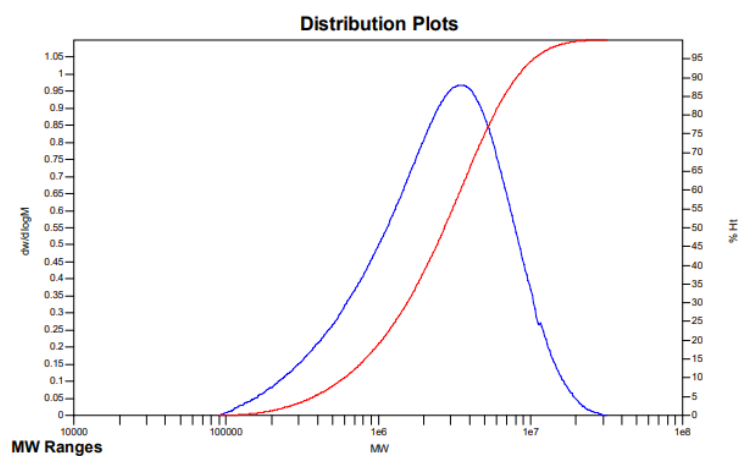

Figure S25. GPC data of the polymer from Table 1, entry 7.

**MW Averages**  
 Mp: 2707222 Mn: 1057687 Mv: 2446778 Mw: 2729397  
 Mz: 4963096 Mz+1: 7313067 PD: 2.5805

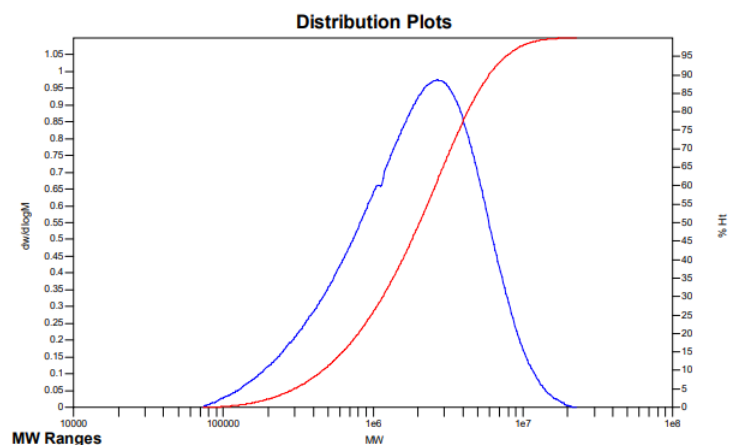

Figure S26. GPC data of the polymer from Table 1, entry 8.

**MW Averages**  
 Mp: 2393291 Mn: 926606 Mv: 2085413 Mw: 2307345  
 Mz: 4014098 Mz+1: 5817539 PD: 2.4901

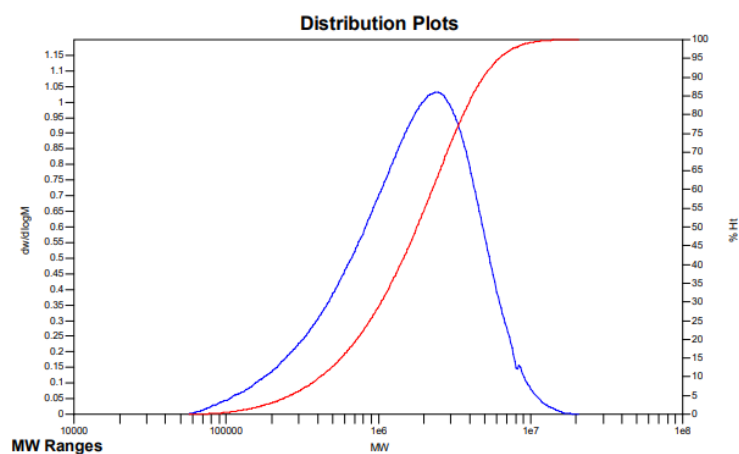

Figure S27. GPC data of the polymer from Table 1, entry 9.

**MW Averages**  
 Mp: 4167473 Mn: 1742976 Mv: 3912747 Mw: 4363069  
 Mz: 7937286 Mz+1: 11742152 PD: 2.5032

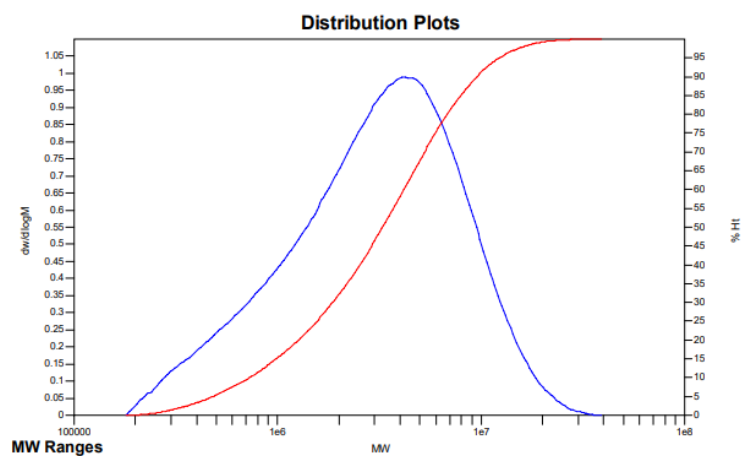

Figure S28. GPC data of the polymer from Table 1, entry 10.



**MW Averages**

Mp: 3062331 Mn: 987997 Mv: 2614708 Mw: 2956992  
Mz: 5725453 Mz+1: 8703246 PD: 2.9929

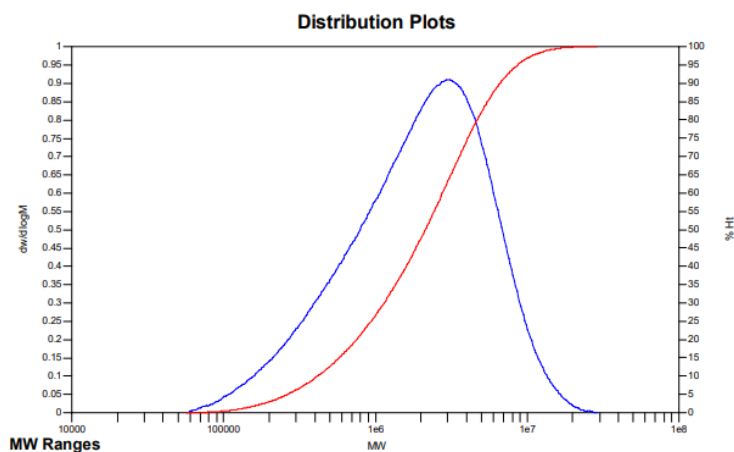

Figure S29. GPC data of the polymer from Table 1, entry 11.

**MW Averages**

Mp: 2820763 Mn: 940319 Mv: 2434581 Mw: 2745464  
Mz: 5253549 Mz+1: 8008309 PD: 2.9197

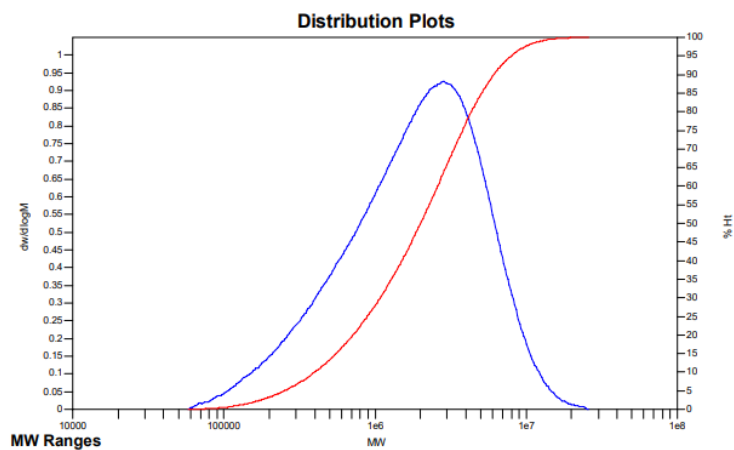

Figure S30. GPC data of the polymer from Table 1, entry 12.

**MW Averages**

Mp: 2879307 Mn: 1037706 Mv: 2444665 Mw: 2720880  
Mz: 4905366 Mz+1: 7407379 PD: 2.6220

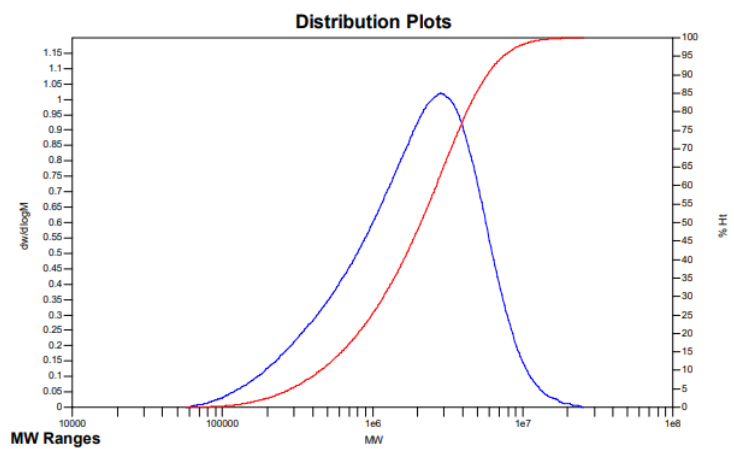

Figure S31. GPC data of the polymer from Table 1, entry 13.

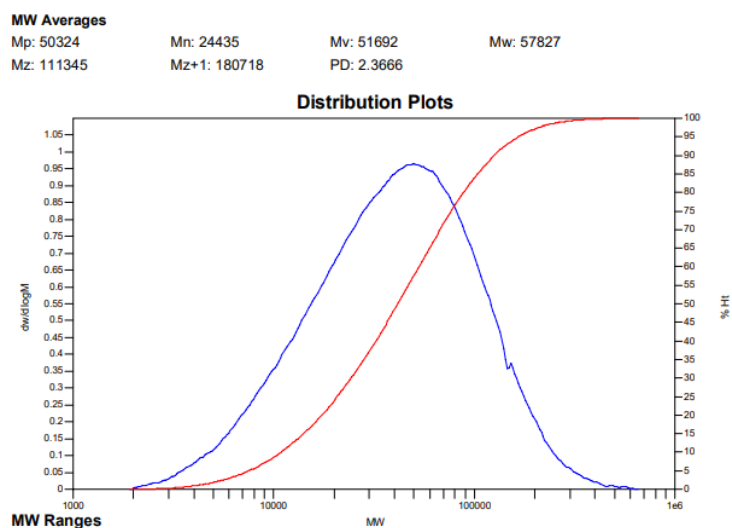

Figure S32. GPC data of the polymer from Table 2, entry 1.

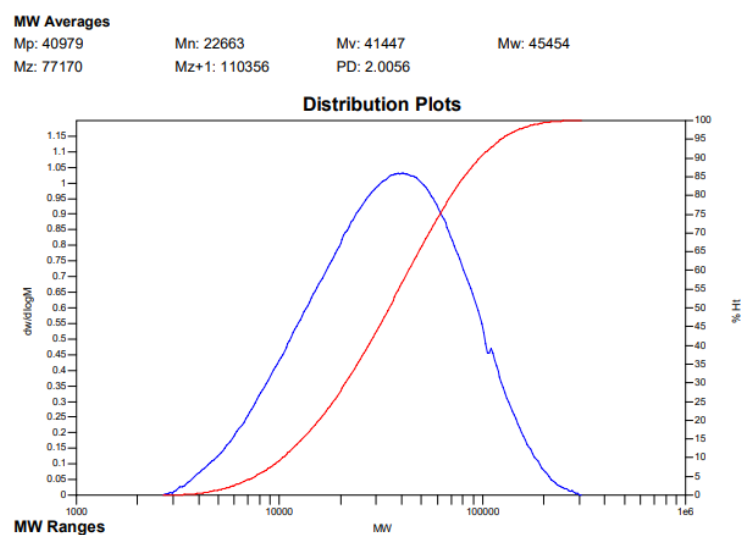

Figure S33. GPC data of the polymer from Table 2, entry 2.

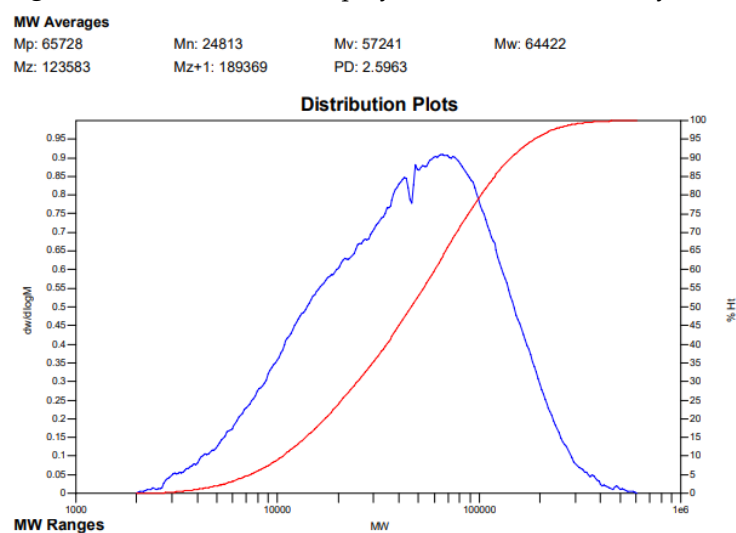

Figure S34. GPC data of the polymer from Table 2, entry 3.

**MW Averages**

Mp: 132154      Mn: 62000      Mv: 137195      Mw: 151893  
Mz: 272272      Mz+1: 419437      PD: 2.4499

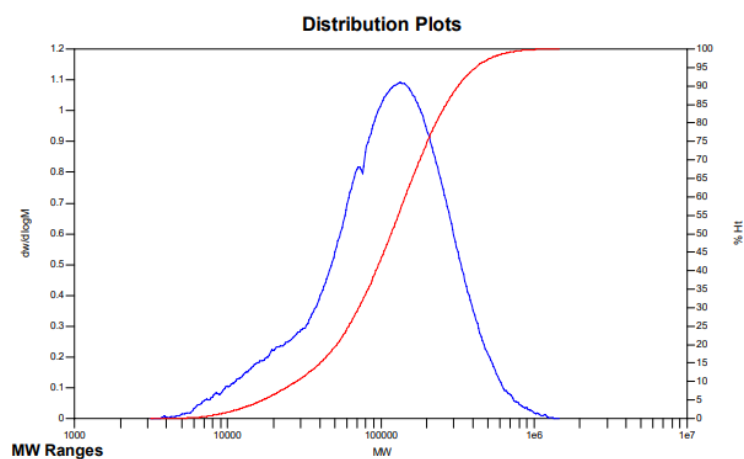

Figure S35. GPC data of the polymer from Table 2, entry 4.

**MW Averages**

Mp: 34768      Mn: 28778      Mv: 108014      Mw: 133767  
Mz: 392033      Mz+1: 671547      PD: 4.6482

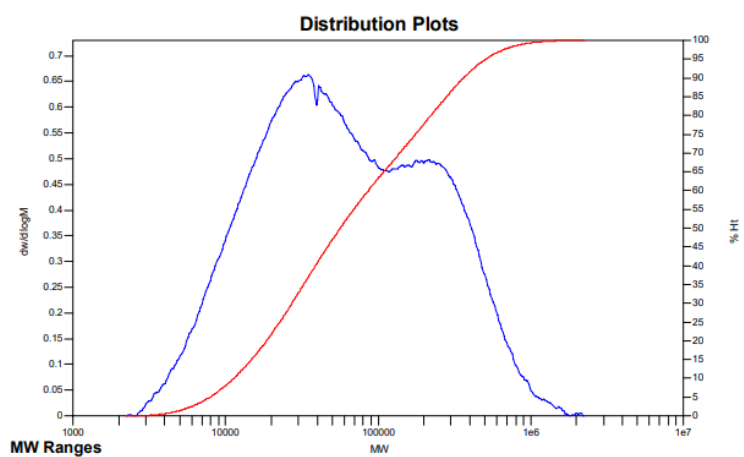

Figure S36. GPC data of the polymer from Table 2, entry 6.

## 2.5 DSC data of copolymer

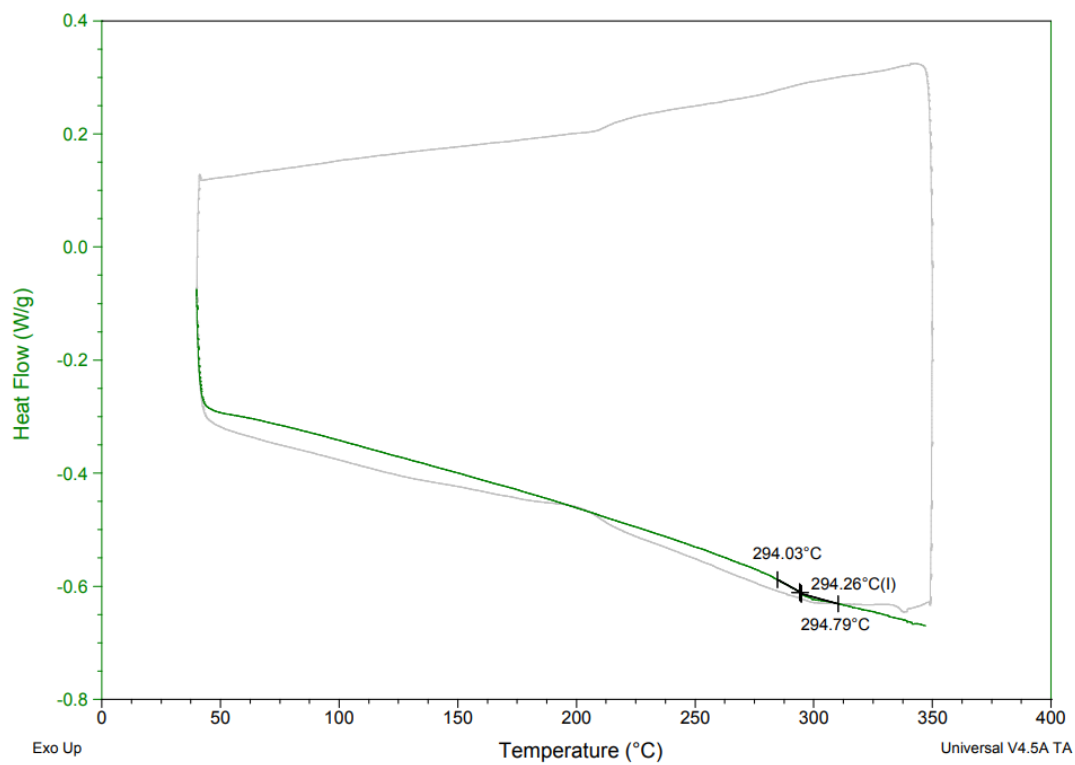

Figure S37. DSC curves of the polymer from Table 2, entry 1

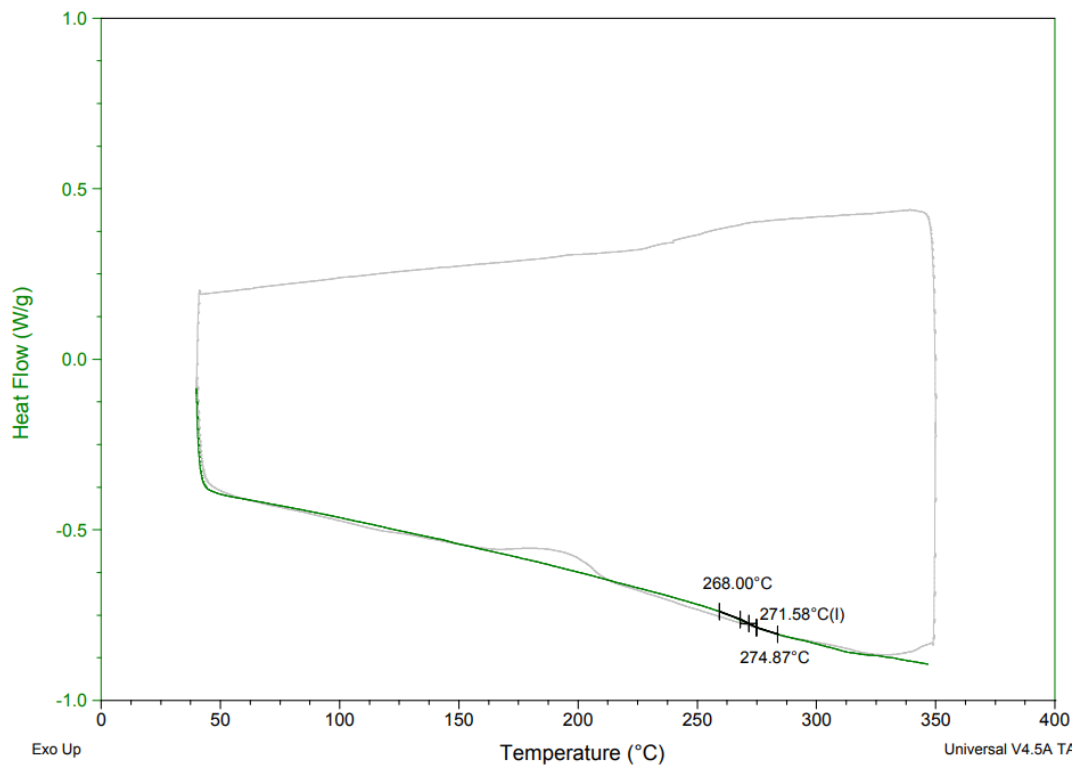

Figure S38. DSC data of the polymer from Table 2, entry 2

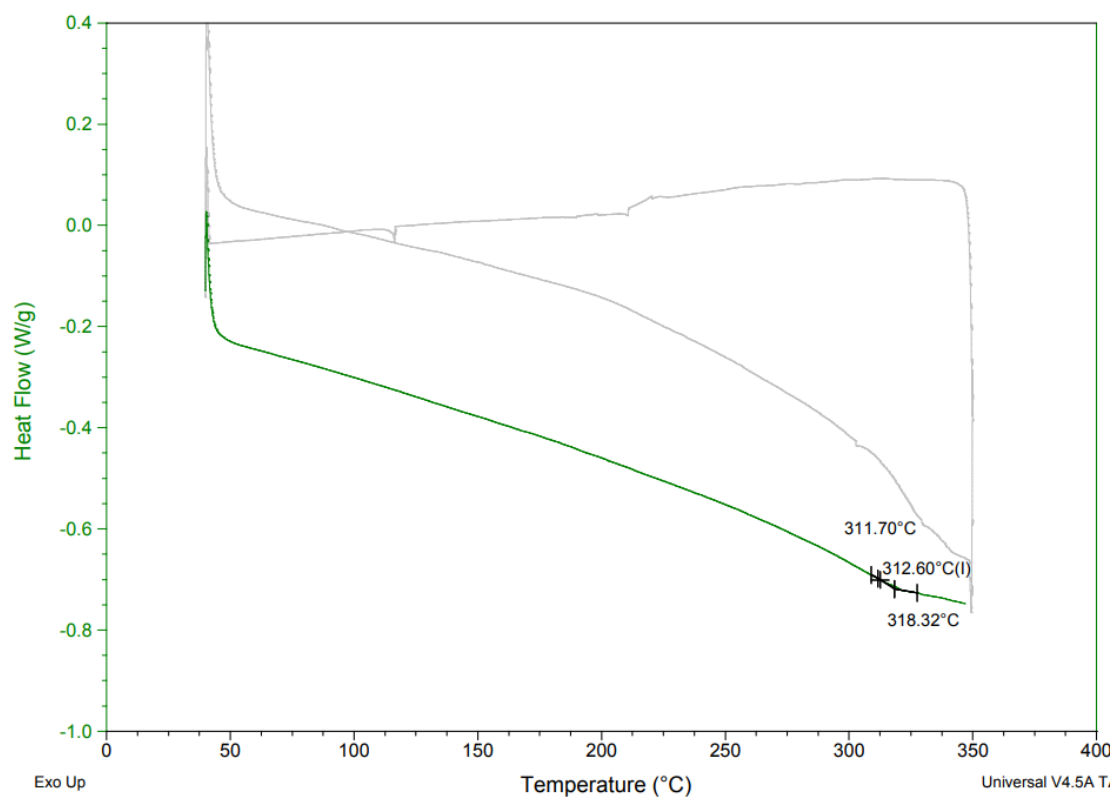

**Figure S39.** DSC data of the polymer from Table 2, entry 3

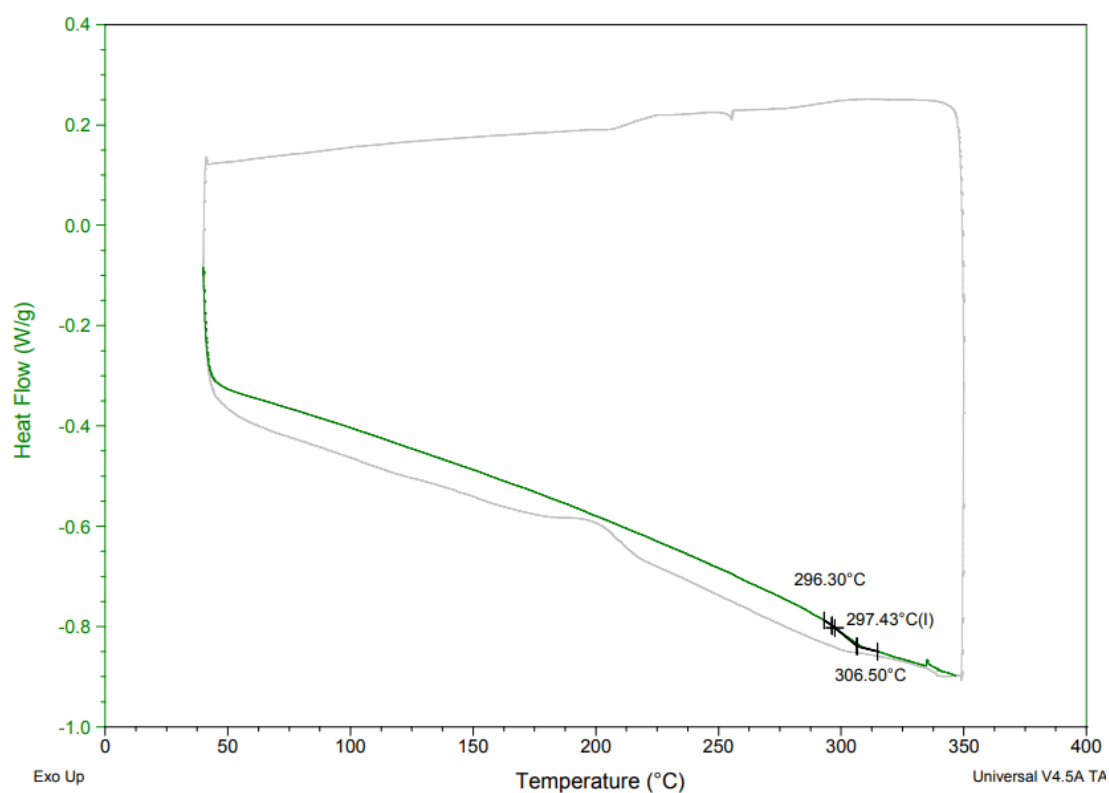

**Figure S40.** DSC data of the polymer from Table 2, entry 5

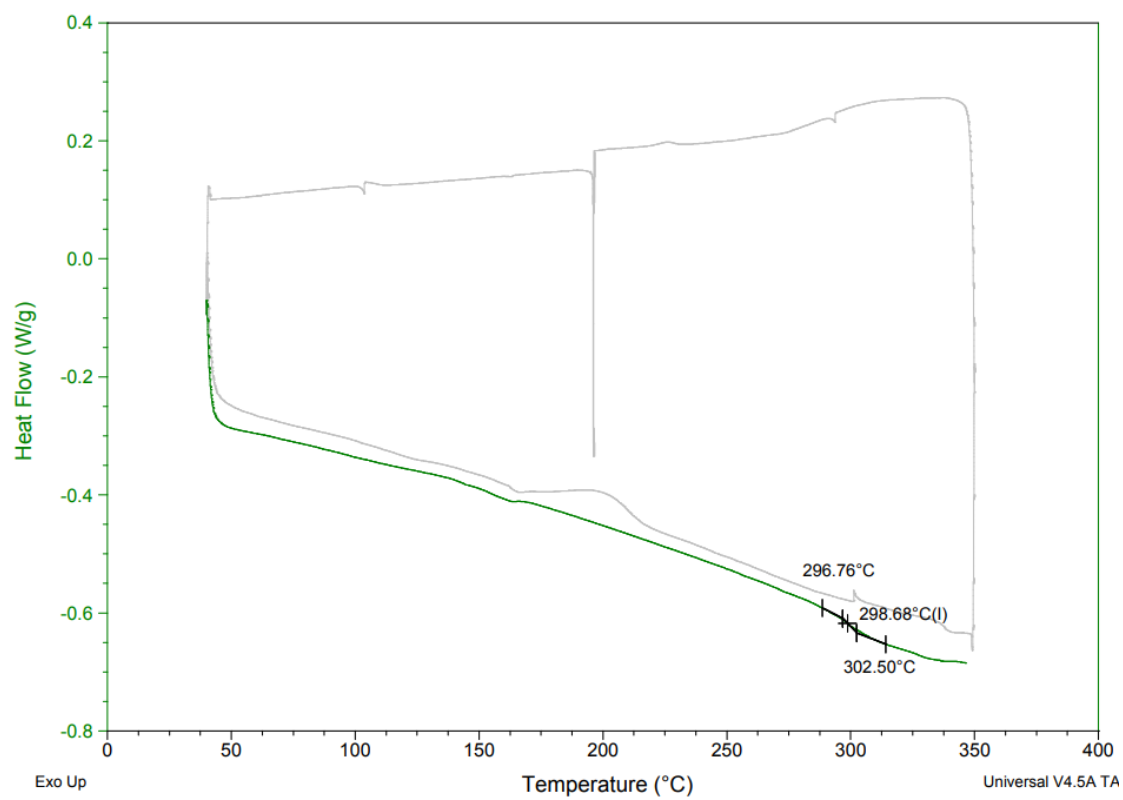

**Figure S41.** DSC data of the polymer from Table 2, entry 6
